# Supplementary material for: Silver paste nanocomposite electrode as a new metallic electrode for amperometric determination of hydrazine
Source: Royal Society of Chemistry journal article supplement (doi:10.1039/c2ay05851k), 2012-01-01
Supplement: c2ay05851k.pdf [file c2ay05851k.pdf]

# Silver Paste Nanocomposite Electrode as a New Metallic Electrode for Amperometric Determination of Hydrazine

Afsaneh Safavi\* and Maryam Tohidi

Department of Chemistry, College of Sciences, Shiraz University, Shiraz, 71454, Iran. \*Email adress: safavi@chem.susc.ac.ir

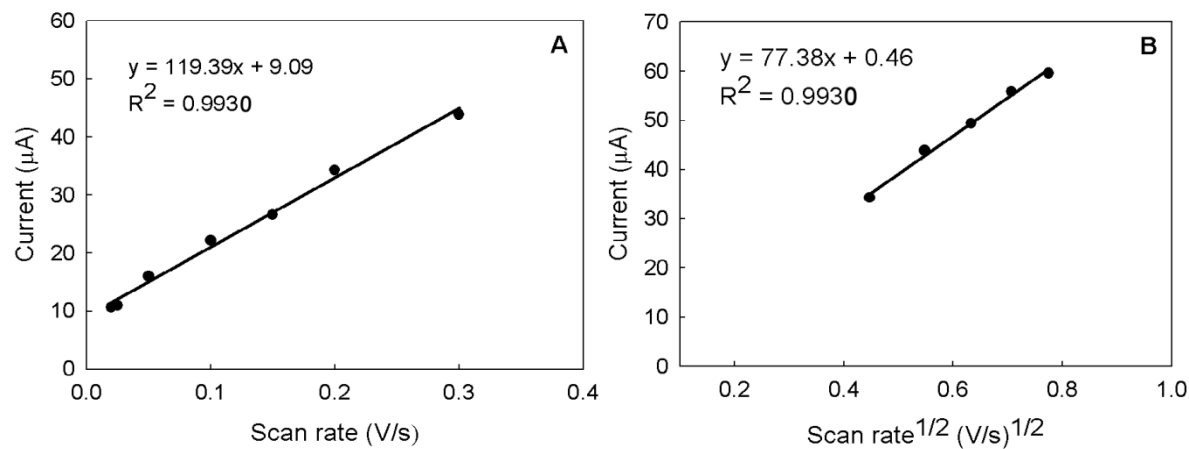

Fig. S1 The dependency of peak currents for 1.0 mM hydrazine in 0.1 M KOH on the (A) ν and (B) ν<sup>1/2</sup>.

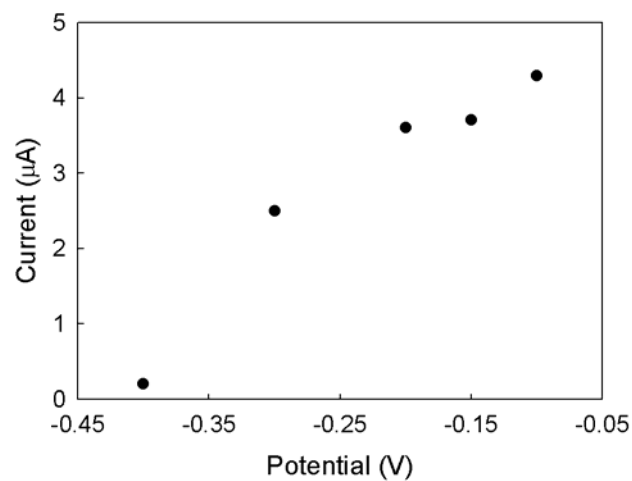

**Fig. S2** Effect of potential on electrocatalytic signal of 0.1 mM hydrazine at Ag paste nanocomposite electrode.

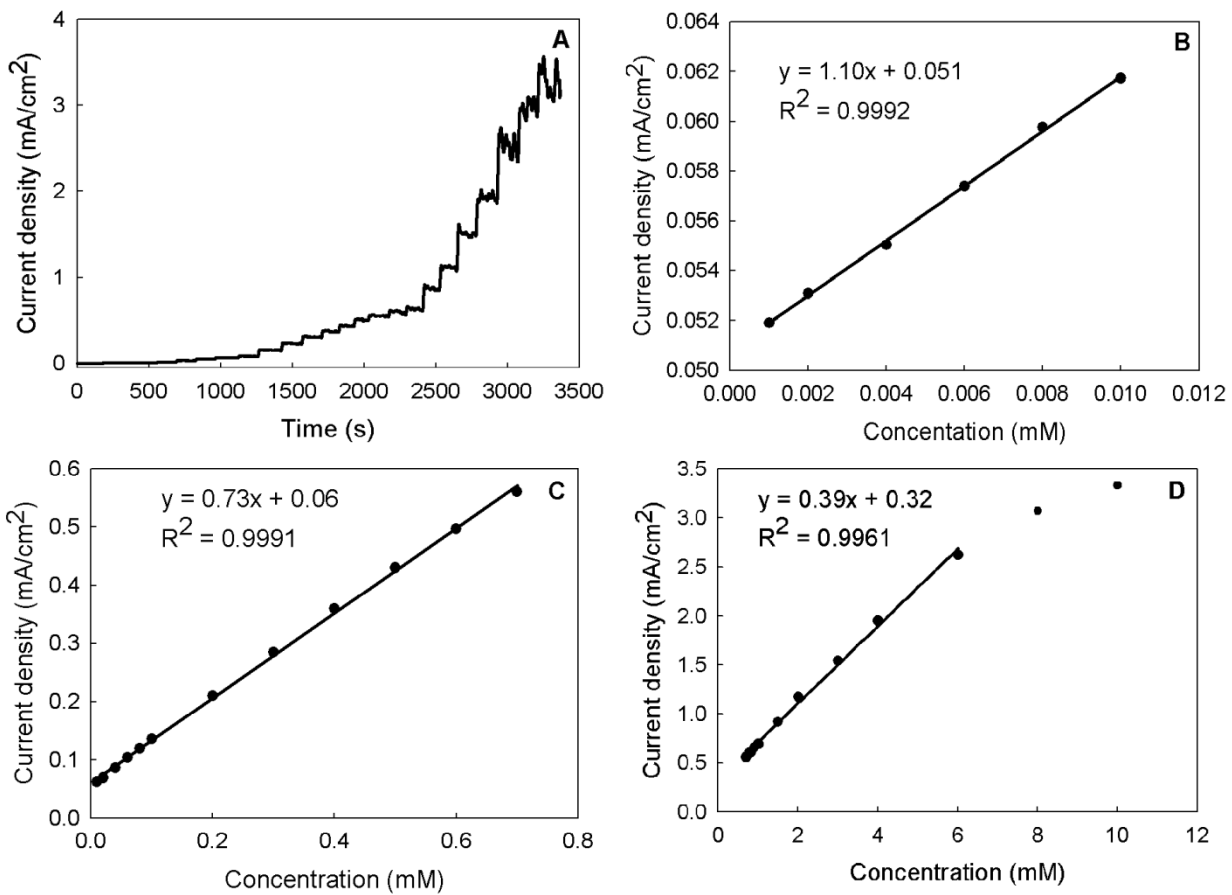

**Fig. S3** (A) Amperometric responses for increasing hydrazine concentrations at Ag paste nanocomposite electrode in 1.0 M KOH. (B)-(D) Calibration curves of different ranges of hydrazine concentrations. Applied potential: -0.15 V.

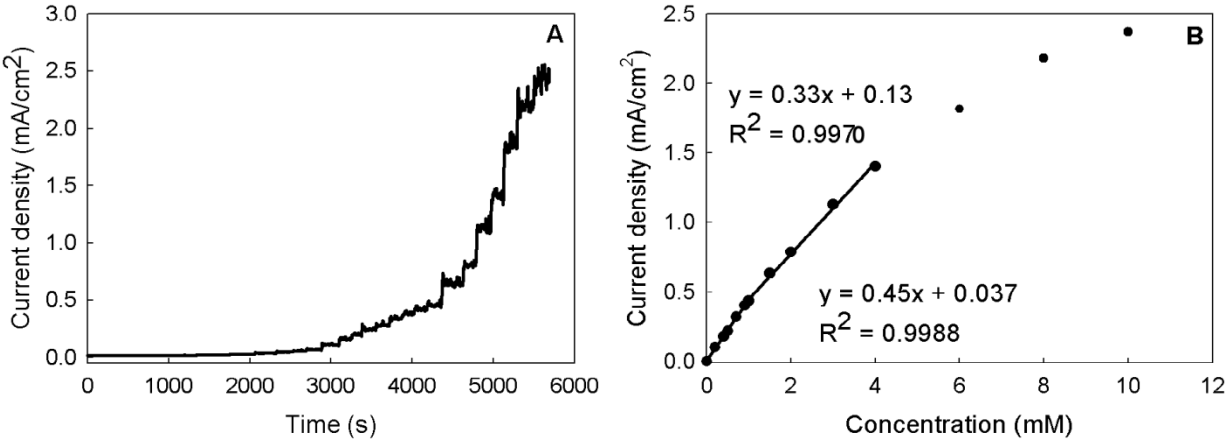

**Fig. S4** (A) Amperometric responses for increasing hydrazine concentrations at Ag disk electrode in 1.0 M KOH and (B) calibration curves of hydrazine concentrations at Ag disk electrode. Applied potential: -0.15 V.

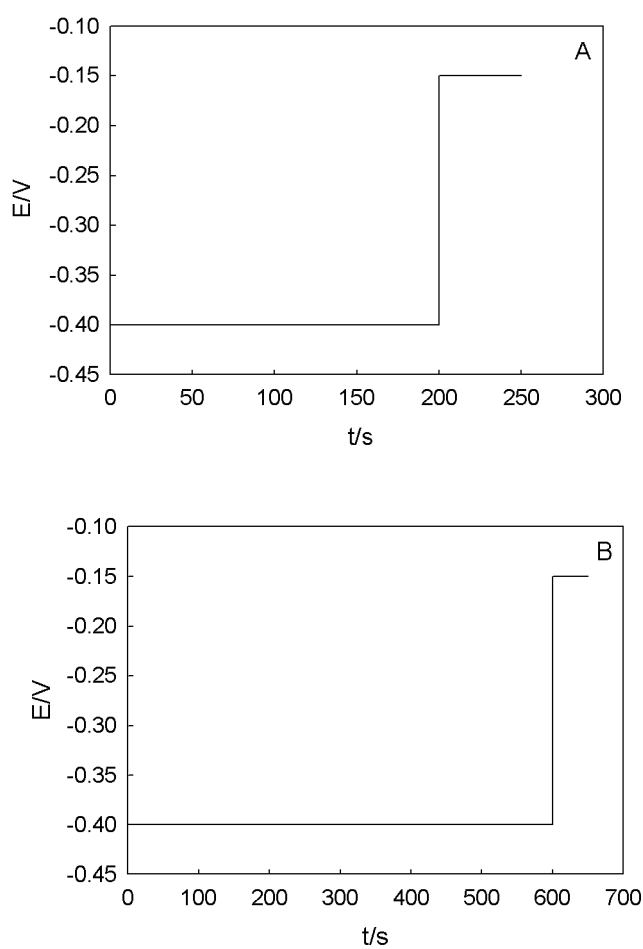

**Fig. S5.** Potential-time double step diagrams with time of (A) 200 s and (B) 600 s in -0.4 V for preconcentration step and 50 s in -0.15 V for anodic stripping step.

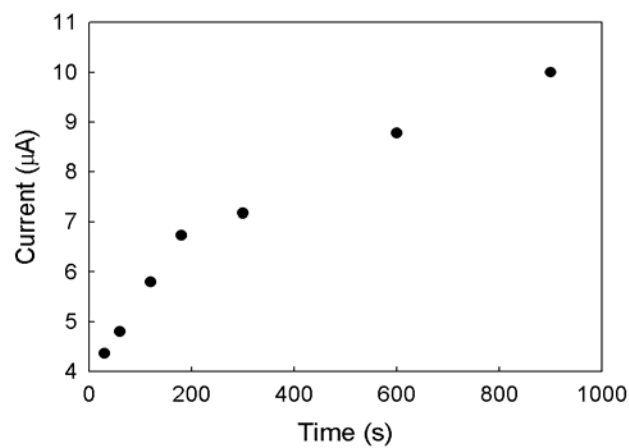

**Fig. S6.** Effect of time of adsorption on electrocatalytic signal of 0.1 mM hydrazine at Ag paste nanocomposite electrode. Applied potentials: first step (-0.4 V) and second step (-0.15 V).
